1 Genome Medicine

2

3

4 **Detection of hematopoietic stem cell transcriptome in human fetal kidneys**  
5 **and kidney organoids derived from human induced pluripotent stem cells**  
6 **(iPSC)**

7

8 **Jin Wook Hwang<sup>1</sup>, Christophe Desterke<sup>1</sup>, Julien Loisel-Duwattez<sup>2</sup>, Frank Griscelli<sup>1,3,4</sup>,**  
9 **Annelise Bennaceur-Griscelli<sup>1,3,4</sup>, Ali G Turhan<sup>1,3,4\*</sup>**

10

11 <sup>1</sup>INSERM U935 / UA09, Université Paris Saclay, 94800 Villejuif, France and ESTeam Paris Sud,  
12 Université Paris Sud, 94800 Villejuif, France.

13 <sup>2</sup>INSERM U1195, Université Paris Saclay, Faculté de Médecine, APHP, Service de Neurologie,  
14 Bicêtre Hospital, 94276, le Kremlin Bicêtre, France

15 <sup>3</sup>INGESTEM National iPSC Infrastructure, 94800 Villejuif, France

16 <sup>4</sup>APHP Paris Saclay, Division of Hematology, Le Kremlin Bicêtre 75006, Villejuif 94800, France.

17 **\* Corresponding author:** Ali G. Turhan, M.D., PhD.

18 Tel: +33 1 45 21 20 06, Fax: +33 1 45 21 28 47, E-mail: [turviv33@gmail.com](mailto:turviv33@gmail.com)

19

20

21

22

23

24 **Abstract**

25 **Background:** In mammals, hematopoietic stem cells (HSC) arise in the dorsal aorta from the  
26 hemogenic endothelium, followed by their migration to fetal liver and to bone marrow. In zebrafish,  
27 kidney is the site of primary hematopoiesis. In humans, the presence of HSC in the fetal or adult kidney  
28 has not been established.

29 **Methods:** We analyzed the presence of HSC markers in human fetal kidneys by analysis of single-cell  
30 datasets. We then analyzed in kidney organoids derived from iPSC, the presence of hematopoietic  
31 markers using transcriptome analyses.

32 **Results:** 12 clusters were identified of stromal, endothelial, and nephron cell type-specific markers in  
33 the two fetal stage (17 weeks) kidney datasets. Among these, expression of hematopoietic cells in  
34 Cluster 9 showed expression of primitive markers. Moreover, whole transcriptome analysis of our iPSC-  
35 derived kidney organoids revealed induction of the primitive hematopoietic transcription factor RUNX1  
36 as found in the human fetal kidney cortex.

37 **Conclusions:** These finding support the presence of cells expressing HSC transcriptome in human  
38 kidney. The mechanisms of the appearance of the cells with the same transcriptional features during  
39 iPSC-derived kidney organoid generation requires further investigation.

40

41 **Keywords:** Transcriptome analysis, hematopoietic stem cells (HSC), human fetal kidney, human  
42 kidney organoids, human induced pluripotent stem cells (iPSC)

43

## 44 **Introduction**

45 Hematopoietic stem cells (HSC) are characterized by their capacity of both self-renewal and  
46 differentiation into blood and immune cell lineages throughout the life of the individual in a stem cell-  
47 regulating microenvironment, or HSC niche. HSC-niche interactions in bone marrow, liver and kidney  
48 have been extensively studied using vertebrate animal models, including mice, frogs, zebrafish, and  
49 chickens [1,2]. During mammalian hematopoiesis, the most primitive hematopoietic cells migrate from  
50 the aorta–gonad–mesonephros (AGM) region to the fetal liver and to the bone marrow which is the site  
51 of adult hematopoiesis [1]. However, the persistence of some degree of hematopoietic activity in adult  
52 tissues is possible as this has been suggested by the discovery of donor-derived chimeric hematopoiesis  
53 after liver transplantation showing the contribution of donor-derived cells to hematopoiesis [3]. To our  
54 knowledge, there has been no study analyzing the possibility of donor-derived hematopoiesis after  
55 kidney transplantation. It should be reminded that in the majority of cases, kidney transplants are  
56 performed using kidneys from deceased donors [4,5]. HSC-kidney niche interactions have been studied  
57 in many reports. For example, zebrafish kidney stromal cell lines can support and maintain early  
58 hematopoietic precursors and differentiation of lymphoid, myeloid, and erythroid precursors [4].

59 Recent advances in single-cell RNA sequencing technology are leading to new discoveries and  
60 validation in fetal organs and organoids [5–7]. Here, we first analyzed the presence of transcriptional  
61 markers of HSC in fetal kidneys through analysis of a single-cell dataset described by Lindström NO  
62 et al [5–7]. We then performed a transcriptome analysis of iPSC-derived kidney organoids. We show  
63 that HSC-related markers can be detected in both in fetal kidneys and the human iPSC-derived kidney  
64 organoids.

65

## 66 **Results**

### 67 **Human fetal kidney cortex harbors cells expressing hematopoietic transcripts**

68 Single cell transcriptome is a powerful technology to investigate cell heterogeneity in a tissue.  
69 Lindström NO et al [5–7] performed these experiments in cortexes tissues isolated from two human  
70 fetal kidneys (17 weeks) by 10X genomics technology. This work allowed us to perform in silico

71 analyses. To this end, we merged and analyzed with Seurat package the 2 respective MTX files  
72 generated by cell ranger in order to suppress batch error and performed downstream unsupervised  
73 analysis. To build the common matrix of the two samples, genes which were found expressed in  
74 minimum 5 cells by sample were conserved. After merging of the data from the two kidney samples,  
75 the Seurat digital matrix comprised 7860 cells for 18119 transcripts. During batch correction with  
76 canonical correlation, we observed that the 2 kidney samples were found well superposed in first  
77 factorial map of canonical correlation (Fig. S1a) and the shared correlation strength decrease on the  
78 thirty components of canonical correlation (Fig. S1b). tSNE analysis on the common variable genes on  
79 the 40 principal components of the principal component analysis allowed to identify 12 clusters (Fig.  
80 1a) reproducible in both kidneys (Fig. S1c). Major of the tSNE central cells comprising clusters 3,2,0,1  
81 expressed mesoderm transcription factor TCF21 (Fig. 1a and Fig. S2), also expression of TCF21 is  
82 positive in cells from cluster 6 which highly expressed matrix molecules such as Lumican (LUM) (Fig.  
83 1a and Fig. S2) Decorin (DCN) and Collagens (COL3A1, COL1A1, COL1A2) (Fig. 1b). In cluster 4,  
84 cells were found to be positive for KDR (Fig. 1a) and CD34 (data not shown), suggesting an expression  
85 profile corresponding to endothelial cells. Cells identified in cluster 7 have a high expression of  
86 downstream NOTCH pathway transcription factor HEY1 such as cells from cluster 0 which are central  
87 proximal from this position during tSNE analysis (Fig. 1a). Some cluster of cells which are left eccentric  
88 (clusters 8 and 11) expressed tubular markers such as FXYD2 (Fig. 1a and Fig. S2) encoding the  
89 sodium/potassium-transporting ATPase subunit gamma. Cluster of cells number 10, also left eccentric  
90 during tSNE analysis expressed some podocyte markers such as PTPRO: Protein Tyrosine Phosphatase,  
91 Receptor Type O (Fig. 1a and Fig. S2), but also SOST: Sclerostin and PODXL: podocalyxin like (Fig.  
92 1b). Cluster of cells number 5 expressed specifically the renin molecule a well-known renal molecule  
93 (Fig. 1a and Fig. S2). These results suggest that tSNE analysis performed post canonical analysis in  
94 these 2 merged samples reflect the cell diversity compatible with kidney organ at this stage of  
95 development described in the original paper [8]. Surprisingly, in unsupervised tSNE analysis of human  
96 kidney cortex, we found the left-top eccentric cluster number 9 (Fig. 1a) which is principally defined  
97 by the specific expression of SRGN (Fig. 1a, Fig. 2a and Table S1). Serglycin (SRGN) is known to be



98 a hematopoietic cell granule proteoglycan. In this cluster of cells, there is also a specific expression of  
99 hematopoietic cluster of differentiation such as PTPRC alias CD45 and CD44 (Fig. 2b). Some  
100 molecules such as CD74 and HLA-DRA implicated in antigen presenting cells functionalities are also  
101 expressed in this cluster of cells (Fig. 2c). Interestingly, a fraction of cells from cluster 9 also expressed  
102 primitive hematopoietic transcription factors such as SPI1 (alias PU.1) and RUNX1 (Fig. 2d). Some of  
103 the cells from the same cluster also expressed CXCR4 receptor which is well known to be expressed  
104 on primitive human hematopoietic cells for their homing function. This original results on cluster 9  
105 suggest the presence of cells with hematopoietic transcriptome with some of them expressing primitive  
106 markers in the human kidney cortex at fetal stage (17 weeks).

107

#### 108 **Generation and characterization of iPSC-derived kidney organoids.**

109 Human iPSC-derived kidney organoids have been generated as previously described [9]. Briefly, iPSC  
110 aggregates were generated in E8 media and Geltrex matrix leading to spontaneous formation of complex  
111 kidney organoids at days 12-14 of the culture. (Fig. 3a). We characterized iPSC-derived kidney  
112 organoids using whole-mounting staining with confocal imaging. As can be seen in Fig. 3b, glomeruli-  
113 like structures, which contained cells that stained for the nephron marker Nephtrin were easily identified  
114 [10]. Moreover, ultrastructure analyses revealed cell-cell junctions and the podocyte foot process  
115 formation in kidney organoids (Fig. 3c).

116

#### 117 **Detection of a hematopoietic transcriptome program iPSC-derived kidney organoids**

118 We performed, in duplicate, whole transcriptome analysis of iPSC derived kidney organoids as  
119 compared to native iPSC with Clariom S human technology. After RMA normalization, we identified  
120 3546 differentially expressed genes (DEG) with LIMMA algorithm (Fig. 4a) comprising 1432 up-  
121 regulated genes. This DEG profile allowed to discriminate experimental sample groups by unsupervised  
122 classification (Fig. 4b). After functional enrichment on WikiPathway database, we identified a  
123 hematopoietic program in iPSC-derived kidney organoids. Especially, we uncovered an up regulation  
124 of RUNX1 and CD34 corresponding to genes expressed in hematopoietic stem cells and that of FLI1,

125 CXCR4, MXI1 downstream at erythrocyte and megakaryocyte progenitor levels. There was also a  
126 repression of MYB megakaryocytic repressor (Fig. 4c). These results suggest the implication of a  
127 hematopoietic transcriptional program in our iPSC-derived kidney organoids and especially induction  
128 of the primitive hematopoietic transcription factor RUNX1 which was also detectable at the single cell  
129 level (Fig. 2d) in human ex vivo fetal kidney cortex.

130

## 131 **Discussion**

132 The involvement of kidney in hematopoiesis has been clearly demonstrated in zebrafish [11]. In  
133 humans, the most primitive hematopoietic cells arise from mesodermal lineage in AGM through  
134 hemogenic endothelium [12]. Kidney is also a tissue developed from mesoderm but the presence of  
135 cells with HSC transcriptome has not been studied. Here, we first analyzed the HSC markers in fetal  
136 kidney through analysis of fetal kidney single cell dataset analyses. In human fetal kidney cortex, we  
137 found some cells expressing RUNX1 in a cluster of cells which harbored expression hematopoietic  
138 markers (Cluster 9 on Fig. 1a and 1b). In cluster 9 of human fetal kidney sc-RNAseq, high expression  
139 of hematopoietic markers was confirmed by the presence of Serglycin (SRGN)-positive cells (Fig. 2a)  
140 as well as cells expressing PTPRC alias CD45 Leukocyte Common Antigen and CD44 (receptor of  
141 hyaluronic acid) (Fig. 2b). Serglycin (alias hematopoietic proteoglycan core protein) is a protein found  
142 in secretory granules of myeloid cells as well as in platelets. Our analysis showed also the presence of  
143 cells positive for MHC class II molecule HLA-DRA and CD74 (Fig. 2c) and most interestingly, cells  
144 expressing of hematopoietic transcription factors SPI1 and RUNX1 (Fig. 2d). Finally, in this cluster 9  
145 of fetal kidney we found a higher expression of CXCR4 receptor of CXCL12 implicated in migration  
146 properties of HSCs (Fig. 2e). All these results allowed to suggest the presence of cells harboring  
147 hematopoietic transcriptome in human fetal kidney.

148 We then analyzed the transcriptome of iPSC-derived kidney organoids and performed differential  
149 expression analysis of the kidney organoid versus parental iPSCs. Microarray analysis revealed  
150 important regulation of transcriptional program of these cells during their differentiation (Fig. 4a). This  
151 differentially expressed program allowed to discriminate group samples by unsupervised classification

152 (Fig. 4b). After functional enrichment performed on up-regulated genes during the differentiation  
153 process of the iPSC-derived kidney organoids, we observed the induction of HSC markers such as  
154 RUNX1 and CD34 (Fig. 4c). It is well established that RUNX1 along with a cis-regulatory elements  
155 integrating the GATA, ETS, and SCL transcriptional networks, plays a major role in HSC generation  
156 [13]. We also found induction of FLI1 during the differentiation of iPSC-derived kidney organoid. SPI1  
157 (alias PU.1), the main target downstream RUNX1 [14] is also a master regulator of hematopoiesis as  
158 it prevents excessive HSC division and exhaustion by controlling the transcription of multiple cell-  
159 cycle regulators [15]. Association of SPI1 and RUNX1 are comprised in a combination of 7  
160 transcription factors which are sufficient to convert hemogenic endothelium into hematopoietic stem  
161 and progenitor cells that engraft myeloid, B and T cells in primary and secondary mouse recipients [16].  
162 In transcriptome analyses of iPSC-derived kidney organoids, we found an up-regulation of MYB which  
163 is known to participate to cell fate decisions between erythropoiesis and megakaryopoiesis in human  
164 hematopoiesis [17]. Amongst the hematopoietic transcripts identified in human fetal kidney cortex, we  
165 have also detected the expression of which, CXCR4 in relation with its ligand CXCL12, is involved in  
166 homing of hematopoietic cells to the bone marrow [18].

167 Our data has some limitations including the fact we can not exclude the presence of mesodermal cells  
168 undergoing the fate of hematopoietic differentiation during our kidney organoid differentiation.  
169 Secondly, we could not identify the presence of cells with HSC functionality (self-renewal;  
170 differentiation) in the current experiments. However these data suggest that at some point during  
171 embryonic development, a special “kidney niche” could appear transiently in humans. The  
172 identification of such a niche or its molecular counterparts could be of major interest to amplify human  
173 HSC for transplantation purposes, such has been described in zebrafish [4,19]. It is known that zebrafish  
174 embryonic stromal trunk (ZEST) cells derived from the HSC emergence site are functionally similar to  
175 the mammalian AGM niche cells. Moreover, ZEST cells and kidney cell lines have similar signaling  
176 properties. [19,20]. Our results suggest that a “kidney microenvironmental niche” niche could be of  
177 interest to generate conditions for HSC culture and expansion.

178

179 **Materials and Methods**

180 • **KEY RESOURCES TABLE**

| <b>REAGENT or RESOURCE</b>                                        | <b>SOURCE</b>            | <b>IDENTIFIER</b> |
|-------------------------------------------------------------------|--------------------------|-------------------|
| Antibodies                                                        |                          |                   |
| Nephrin                                                           | Abcam                    | ab85379           |
| DAPI                                                              | Sigma-aldrich            | D9542             |
| <b>Chemicals, Peptides, and Recombinant Proteins</b>              |                          |                   |
| Essential 8 basal medium                                          | Thermo Fisher Scientific | A1516901          |
| Essential 8 supplement                                            | Thermo Fisher Scientific | A1517101          |
| Geltrex® LDEV-Free Reduced Growth Factor Basement Membrane Matrix | Thermo Fisher Scientific | A1413202          |
| ROCK inhibitor                                                    | Global stem              | GSR-6102          |
| <b>REAGENT or RESOURCE</b>                                        | <b>SOURCE</b>            | <b>IDENTIFIER</b> |
| Experimental Models : Cell Lines                                  |                          |                   |
| Human iPSC: PB33                                                  | Human                    | -                 |
| Osmium tetroxide solution                                         | Sigma-aldrich            | 75632             |
| Glutaraldehyde grade I                                            | Sigma-aldrich            | G5882             |
| <b>Software and Algorithms</b>                                    |                          |                   |
| ImageJ                                                            |                          |                   |

181

182 **Generation of iPSC**

183 The iPSC line used in this study was generated using Sendai virus-mediated gene transfer of the four

184 “Yamanaka” factors as previously described (9).

185

### 186 **Generation of Kidney organoids**

187 iPSCs were maintained on Geltrex (Stem Cell Technologies, Inc) coated flat culture dish in E8 media  
188 (Stem Cell Technologies, Inc) according to manufacturer's guidelines. Colonies were manually  
189 harvested at 60-80% confluence. Cells were then collected and dissociated into single cells using EDTA.  
190 Cells ( $1 \times 10^6$  or  $1 \times 10^5$ /well) were put onto ultra low attachment 24 well or 96 well plate (Corning,  
191 Inc) to allow them to form aggregated in suspension with ROCK inhibitor (2-5  $\mu\text{mol}$ ). Cell aggregates  
192 were cultured in E8 medium (Stem Cell Technologies) with daily medium change for 6-7 days. Control  
193 iPSC-A (iPSC-aggregates) were plated on a Geltrex (Stem Cell Technologies) in 96 well plate or 8 well  
194 culture chamber. And then aggregates were treated E8 medium (Stem Cell Technologies) with daily  
195 medium change for 12-14 days. Images were taken using a NIKON microscope.

196

### 197 **Whole-mount immunostaining of 3D kidney organoids**

198 Kidney organoids cultured on 96-well culture dishes were washed with phosphate-buffered saline (PBS),  
199 fixed with 4% paraformaldehyde in PBS for 120 min, permeabilized with 0.2% Triton X-100 (Sigma)  
200 in PBS and blocked in 10% serum. For nephrin staining, the antibody (Nephrin (Cat#ab85379; Abcam)  
201 was diluted in PBS containing 10% serum and washed in PBS. Samples were incubated with secondary  
202 antibodies in antibody dilution buffer, then washed in PBS. Nuclei were labeled with DAPI mounting  
203 medium. Visualization and capture were realized with a Zeiss confocal microscope.

204

### 205 **Transmission Electron Microscopy (TEM)**

206 Kidney organoids were gently centrifuged, and pelleted before the TEM process as follows. The cells  
207 were fixed in 2.5% glutaraldehyde in phosphate-buffered saline (PBS) for 1h at 4°C, washed in PBS,  
208 and fixed in 1% osmium tetroxide in PBS for 1h. They were dehydrated in ascending series of graded  
209 ethyl alcohols, then in acetone. Each sample was infiltrated with the resin before being embedded in  
210 epoxy resin and polymerized for 72h. Semi-thin sections of about 0.5 to 1  $\mu\text{m}$  were obtained and colored  
211 with Toluidine blue before being examined via a light microscope with an associated digital camera,

212 hooked to a computer for image processing and editing (Leica DC 300). Ultra thin sections of about  
213 60/90 nm were contrasted with heavy metals (uranyl acetate and lead citrate) and were examined using  
214 a Jeol 1010 transmission electron microscope at an accelerated voltage of 80kV. Images were  
215 photographed on digital images Gatan Digital Micrograph : brure Erlangen 500w : camera and edited  
216 by Image J and Microsoft Power Point.

217

### 218 **Human fetal single cell transcriptome analysis**

219 Dataset GSE112570 of Single Cell RNA-Sequencing allow to explore cellular heterogeneity of human  
220 kidney cortical nephrogenic niche [8]. Experiments were performed with technology 10X Genomics  
221 single-cell RNA sequencing on two human kidney samples (17 weeks) respectively indexed in Gene  
222 Expression Omnibus (GEO) database: GSM3073088, GSM3073089. Molecular index was realized:  
223 Chromium Single Cell 3' v2 single cell RNA-Seq of poly A selected mRNA kit (10X Genomics) and  
224 Sequencing was processed on NextSeq 500 (Illumina). Bioinformatics base call by bcl2fastq v. 2.17;  
225 reads were mapped using STAR 2.5.1b (Genome: GRCh37) and count tables were generated using the  
226 Cell Ranger software version 1.3.1. Downstream bioinformatics single cell transcriptome analyses were  
227 performed in R software version 3.4.3. Digital matrix were built with both 10X MTX files and merged  
228 in Seurat R-package version 2.3.0 [5] with package dependencies of matrix version 1.2-12, cowplot  
229 0.9.2 and ggplot2 version 2.2.1 [21]. Batch correction was performed with canonical correlation on  
230 thirty dimensions before mathematical dimension reduction with tSNE algorithm. Also, dplyr library  
231 version 0.7.4 was used to generate intermediate table of best genes by cluster. Bioinformatics code to  
232 perform these single cell analyses was deposited at the following web address:  
233 <https://github.com/cdesterke/hskidney/>.

### 234 **Kidney organoid microarray analysis**

235 Microarray Clariom S human was done on process total RNA from human WT iPSC and its derived  
236 kidney organoids in duplicates [9]. Expression matrix was built with CEL files generated on Affymetrix  
237 Station and normalized by RMA method with TAC version 4.0 software (Appliedbiosystems) (Irizarry  
238 et al., 2003). Differential expressed genes were estimated with linear models for microarray data

239 (LIMMA) algorithm by using a false discovery rate threshold less 5 percent [22]. Functional enrichment  
240 analysis on differential expressed genes was performed on WikiPathway database.

241

## 242 **Author Contributions**

243 JWH and AGT conceived, designed, analyzed data and wrote the manuscript. JWH performed all  
244 organoids experiments and performed confocal laser scanning microscopy with analysis. JLD  
245 performed TEM, CD analyzed bioinformatics data, ABG, FG, AGT analyzed data and supervised the  
246 project. JWH, CD and AGT wrote the paper.

247

## 248 **References**

249 1. Gao X, Xu C, Asada N, Frenette PS. The hematopoietic stem cell niche: from embryo to adult. *Dev Camb Engl.*  
250 2018;145.

251 2. Mikkola HKA, Orkin SH. The journey of developing hematopoietic stem cells. *Development.* 2006;133:3733–  
252 44.

253 3. Taniguchi H, Toyoshima T, Fukao K, Nakauchi H. Presence of hematopoietic stem cells in the adult liver. *Nat*  
254 *Med.* 1996;2:198–203.

255 4. Stachura DL, Reyes JR, Bartunek P, Paw BH, Zon LI, Traver D. Zebrafish kidney stromal cell lines support  
256 multilineage hematopoiesis. *Blood.* 2009;114:279–89.

257 5. Butler A, Hoffman P, Smibert P, Papalexi E, Satija R. Integrating single-cell transcriptomic data across different  
258 conditions, technologies, and species. *Nat Biotechnol.* 2018;36:411–20.

259 6. Menon R, Otto EA, Kokoruda A, Zhou J, Zhang Z, Yoon E, et al. Single-cell analysis of progenitor cell  
260 dynamics and lineage specification in the human fetal kidney. *Dev Camb Engl.* 2018;145.

261 7. Park J, Shrestha R, Qiu C, Kondo A, Huang S, Werth M, et al. Single-cell transcriptomics of the mouse kidney  
262 reveals potential cellular targets of kidney disease. *Science.* 2018;360:758–63.

263 8. Lindström NO, De Sena Brandine G, Tran T, Ransick A, Suh G, Guo J, et al. Progressive Recruitment of  
264 Mesenchymal Progenitors Reveals a Time-Dependent Process of Cell Fate Acquisition in Mouse and Human  
265 Nephrogenesis. *Dev Cell.* 2018;45:651–660.e4.

266 9. Hwang JW, Desterke C, Féraud O, Richard S, Ferlicot S, Verkarre V, et al. iPSC-Derived Embryoid Bodies as  
267 Models of c-Met-Mutated Hereditary Papillary Renal Cell Carcinoma. *Int J Mol Sci.* 2019;20.

268 10. Ruotsalainen V, Patrakka J, Tissari P, Reponen P, Hess M, Kestilä M, et al. Role of nephrin in cell junction  
269 formation in human nephrogenesis. *Am J Pathol.* 2000;157:1905–16.

270 11. Ej P, Li Z. Hematopoietic development in the zebrafish [Internet]. *Int. J. Dev. Biol.* 2010 [cited 2020 Dec 4].  
271 Available from: <https://pubmed.ncbi.nlm.nih.gov/20711990/>

272 12. Dzierzak E, Speck NA. Of lineage and legacy – the development of mammalian hematopoietic stem cells. *Nat*  
273 *Immunol.* 2008;9:129–36.

274 13. Nottingham WT, Jarratt A, Burgess M, Speck CL, Cheng J-F, Prabhakar S, et al. Runx1-mediated

- 275 hematopoietic stem-cell emergence is controlled by a Gata/Ets/SCL-regulated enhancer. *Blood*. 2007;110:4188–  
276 97.
- 277 14. Imperato MR, Cauchy P, Obier N, Bonifer C. The RUNX1-PU.1 axis in the control of hematopoiesis. *Int J*  
278 *Hematol*. 2015;101:319–29.
- 279 15. Staber PB, Zhang P, Ye M, Welner RS, Nombela-Arrieta C, Bach C, et al. Sustained PU.1 levels balance cell-  
280 cycle regulators to prevent exhaustion of adult hematopoietic stem cells. *Mol Cell*. 2013;49:934–46.
- 281 16. Sugimura R, Jha DK, Han A, Soria-Valles C, da Rocha EL, Lu Y-F, et al. Haematopoietic stem and progenitor  
282 cells from human pluripotent stem cells. *Nature*. 2017;545:432–8.
- 283 17. Bianchi E, Bulgarelli J, Ruberti S, Rontautoli S, Sacchi G, Norfo R, et al. MYB controls erythroid versus  
284 megakaryocyte lineage fate decision through the miR-486-3p-mediated downregulation of MAF. *Cell Death*  
285 *Differ*. 2015;22:1906–21.
- 286 18. Sugiyama T, Kohara H, Noda M, Nagasawa T. Maintenance of the hematopoietic stem cell pool by CXCL12-  
287 CXCR4 chemokine signaling in bone marrow stromal cell niches. *Immunity*. 2006;25:977–88.
- 288 19. Wolf A, Aggio J, Campbell C, Wright F, Marquez G, Traver D, et al. Zebrafish Caudal Haematopoietic  
289 Embryonic Stromal Tissue (CHEST) Cells Support Haematopoiesis. *Sci Rep*. 2017;7:1–12.
- 290 20. Mahony CB, Bertrand JY. How HSCs Colonize and Expand in the Fetal Niche of the Vertebrate Embryo: An  
291 Evolutionary Perspective. *Front Cell Dev Biol* [Internet]. 2019 [cited 2020 Dec 14];7. Available from:  
292 <https://www.frontiersin.org/articles/10.3389/fcell.2019.00034/full>
- 293 21. Wickham H. *ggplot2: Elegant Graphics for Data Analysis*. Springer-Verl N Y. 2009;
- 294 22. Ritchie ME, Phipson B, Wu D, Hu Y, Law CW, Shi W, et al. *limma* powers differential expression analyses  
295 for RNA-sequencing and microarray studies. *Nucleic Acids Res*. 2015;43:e47.

296

297

298

299

300

301

302

303 **Figures**



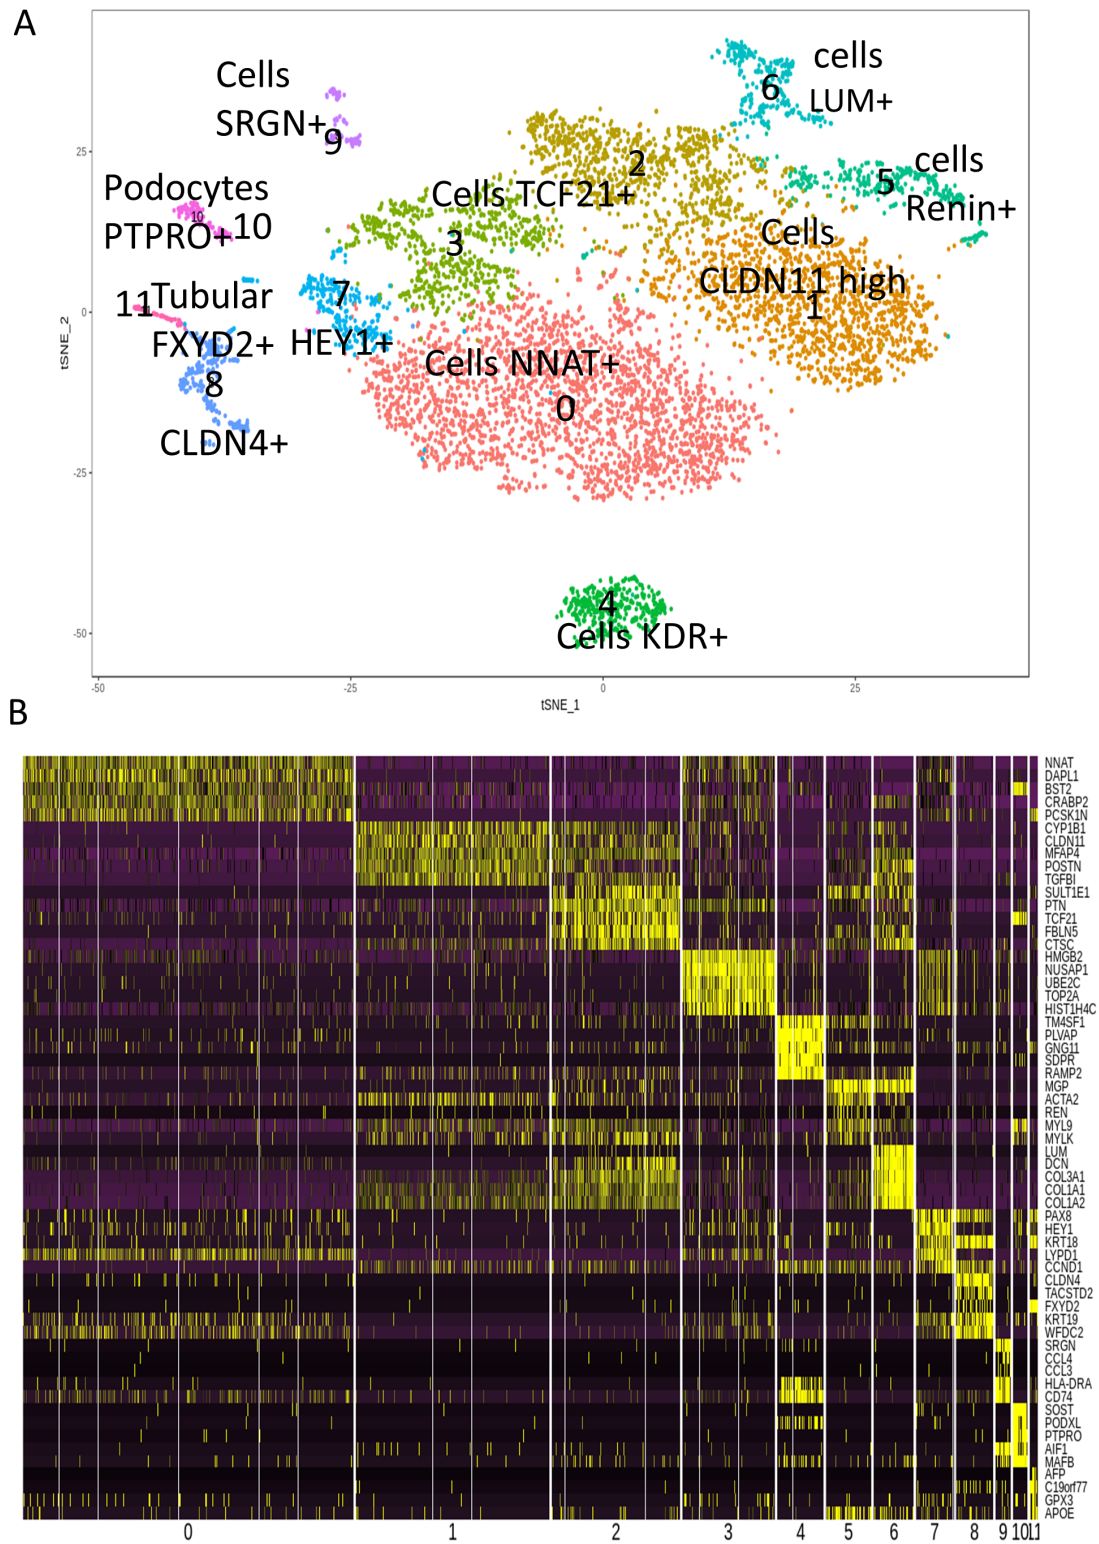

305 **Fig. 1 Cell heterogeneity in human fetal kidney cortex by single cell transcriptome.**

306 **a** tSNE plot with eleven cell clusters from the combined analysis of the merged fetal kidney cortex (2  
307 human kidneys 17 weeks; 7860 cells) after canonical correlation.

308 **b** Heatmap with the expression pattern of the top five cluster-specific genes in 11 clusters identified in  
309 human fetal kidney cortex.

310

311

312

313

314

315

316

317

318

319

320

321

322

323

324

325

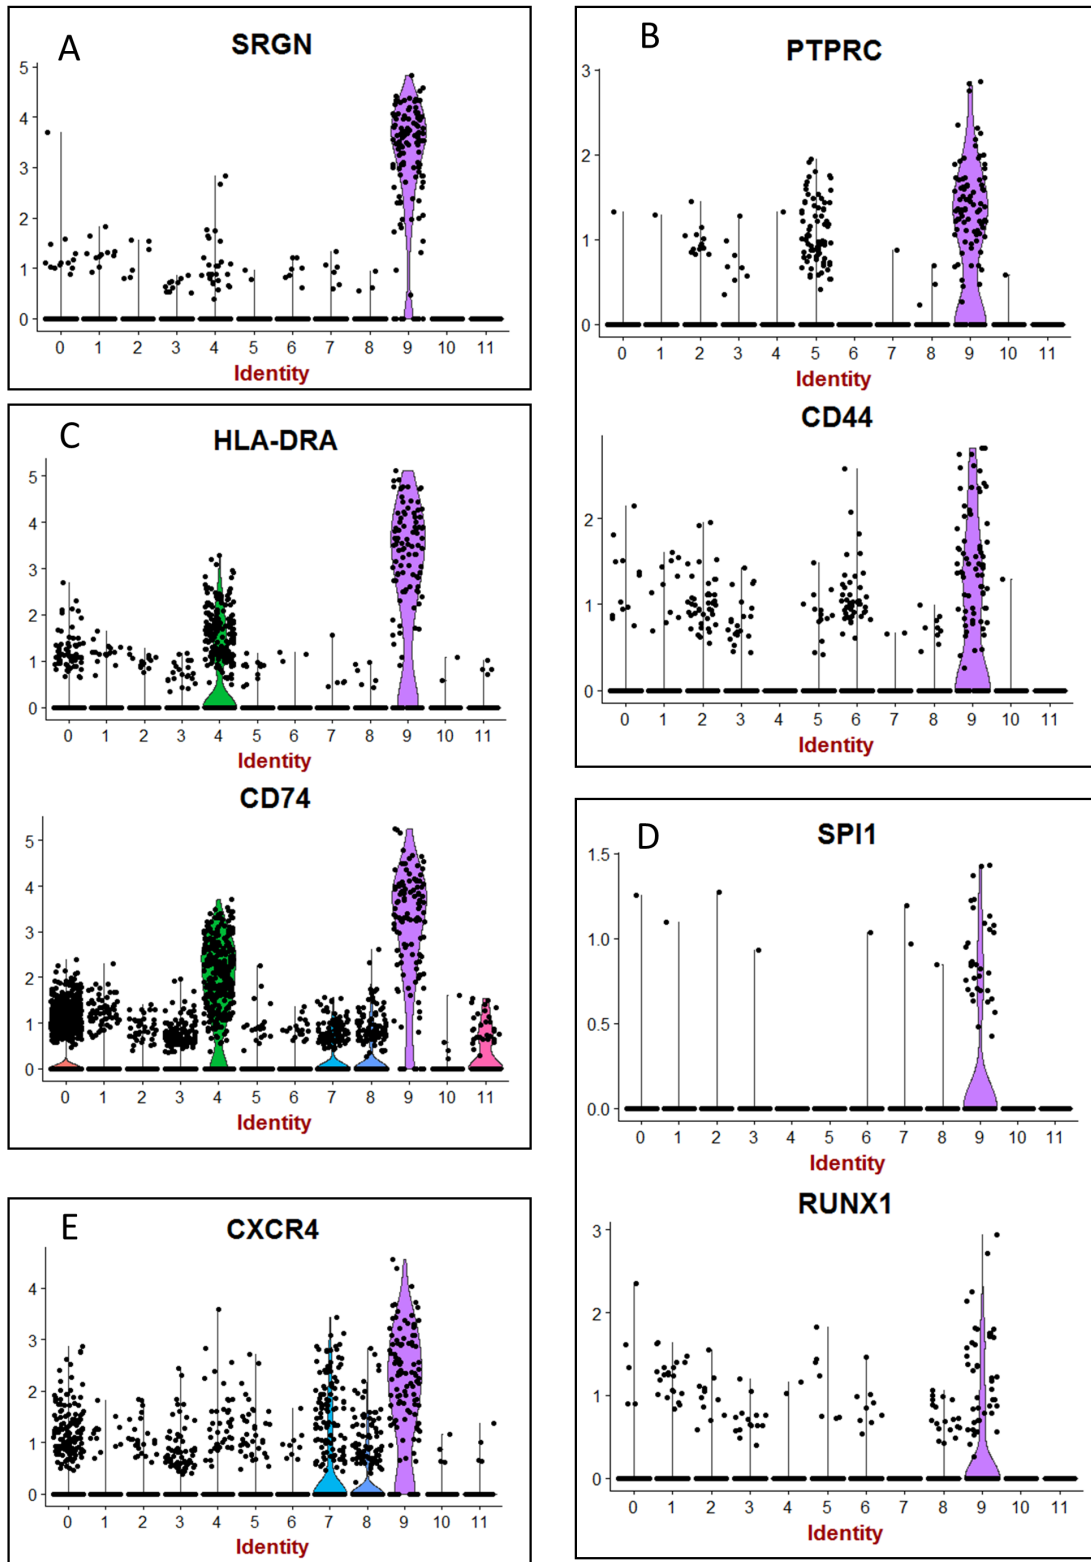

Figure 2

327 **Fig. 2 Hematopoietic transcripts detected in human fetal kidney cortex by single cell RNA**  
328 **sequencing.**

329 **a** Violinplot of SRGN expression.

330 **b** Violinplot of hematopoietic clusters of differentiation (PTPRC Alias CD45).

331 **c** Violinplot of expression of transcripts of differentiated hematopoietic cells (HLA-DRA: HLA-DR  
332 Alpha).

333 **d** Violinplot of expression of SPI1 (PU.1) and RUNX1.

334 **e** Violinplot of expression for CXCR4 receptor.

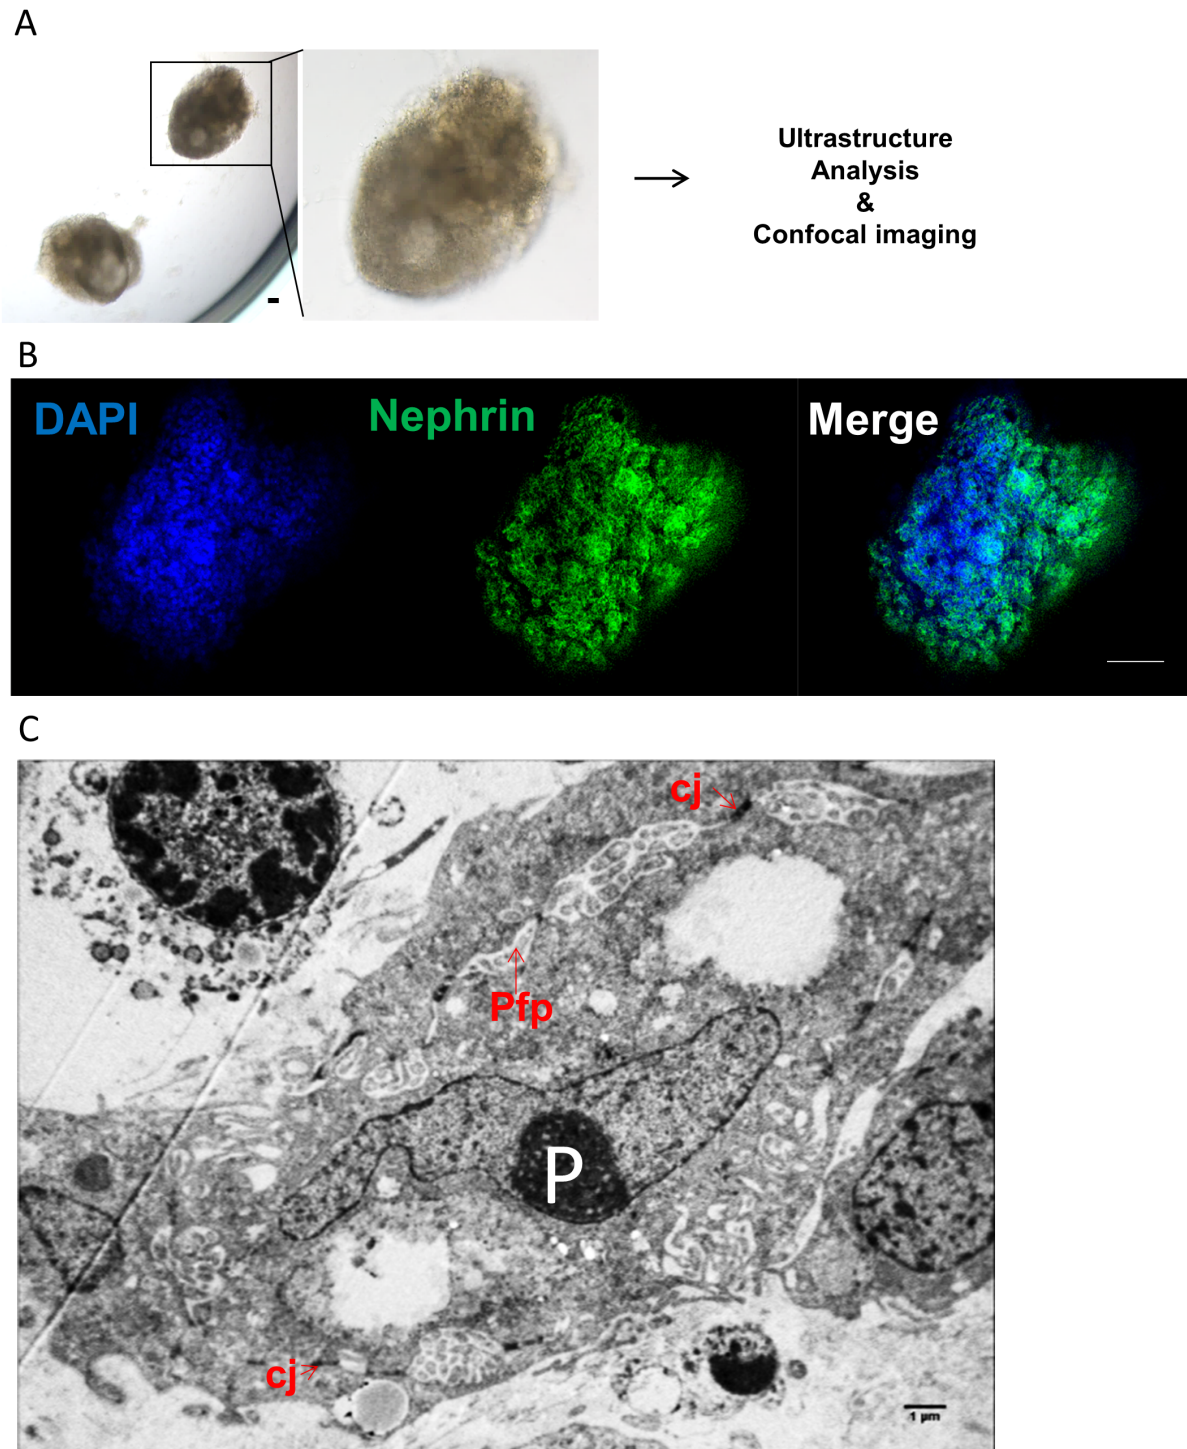

Figure 3

336 **Fig. 3 Characterization of human iPSC-derived kidney organoids.**

337 **a** Optical image of iPSC-derived kidney organoids at day+14. Scale bar : 100  $\mu\text{m}$ .

338 **b** Confocal analysis and whole-mount staining for Nephtrin in iPSC-derived kidney organoids showing  
339 nephron vesicles. Scale bar : 50  $\mu\text{m}$ .

340 **c** Representative electron microscopy image of podocytes in iPSC-derived kidney organoid at day+ 14  
341 showing podocytes (P), podocyte foot process (Pfp) and cell-cell junctions (cj). Scale bar : 1  $\mu\text{m}$ .

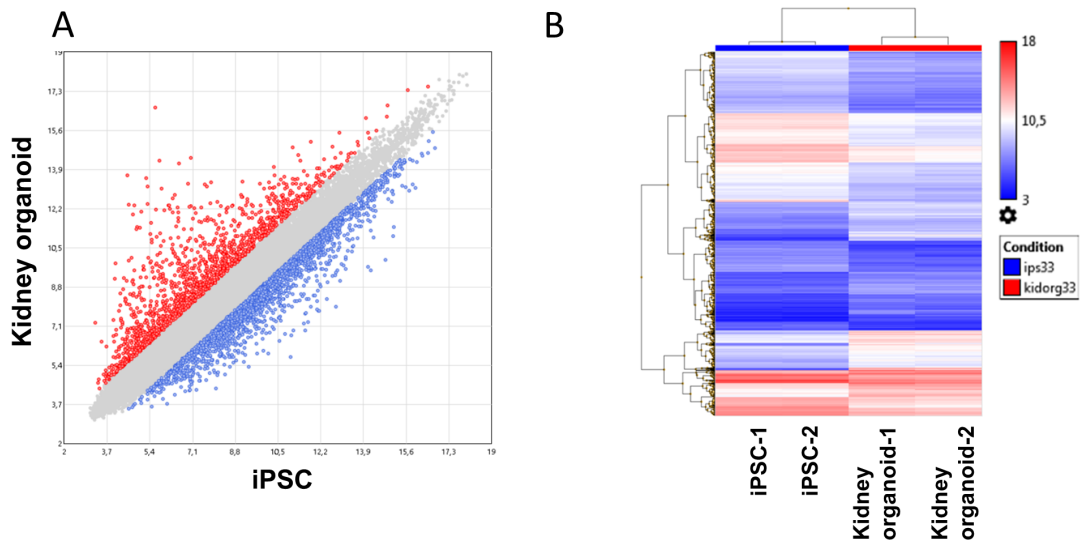

## Hematopoietic stem cell differentiation

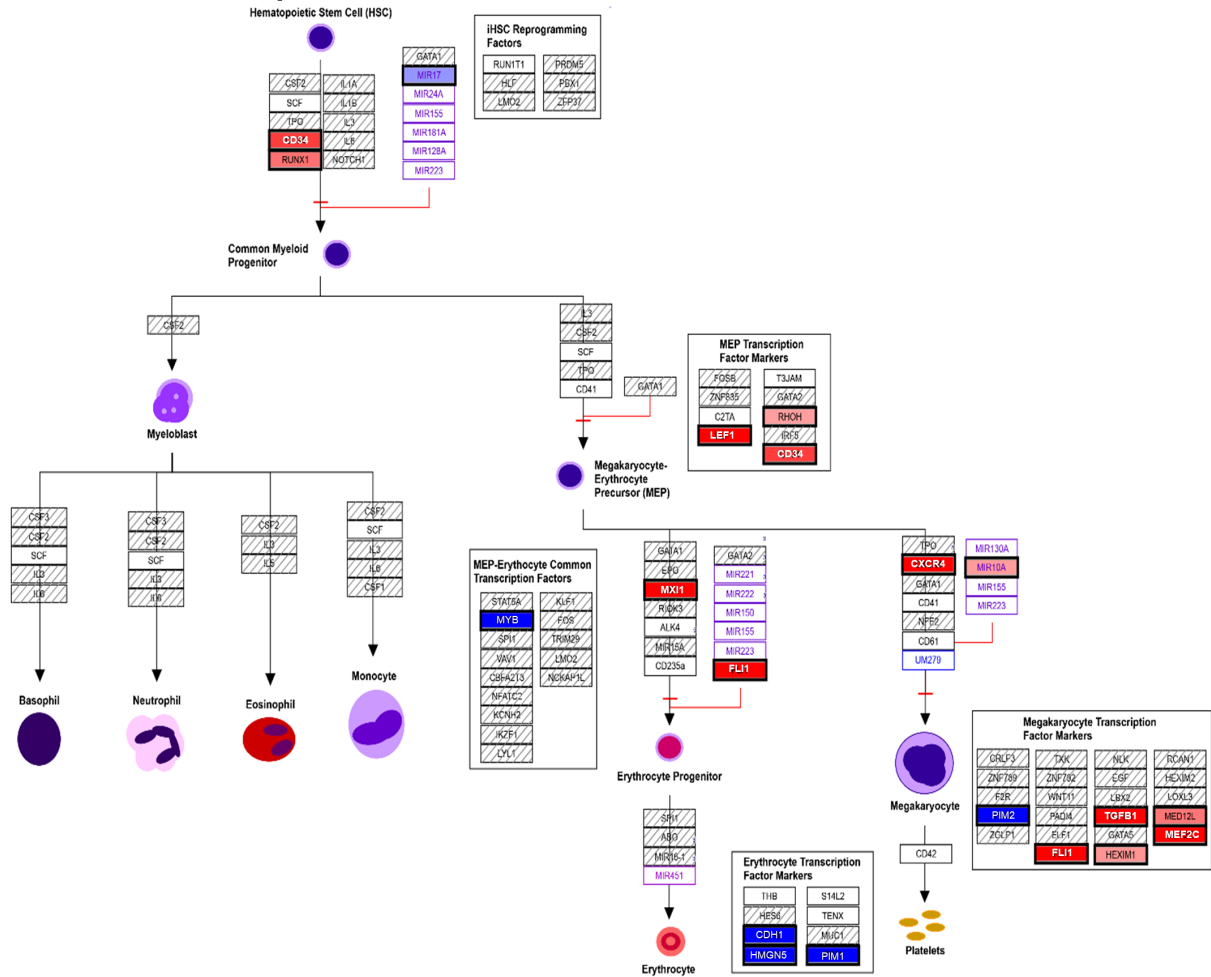

Figure 4

343 **Fig. 4 Transcriptional program induced in kidney organoid derived from human iPSC.**

344 **a** Scatterplot of differential expressed genes found in transcriptome of kidney organoid versus iPSC.

345 **b** Expression heatmap with unsupervised classification performed on differentially expressed genes  
346 induced during kidney organoid differentiation from iPSC.

347 **c** Functional enrichment performed on WikiPathway database showing potential implication  
348 hematopoietic stem cell function during differentiation of kidney organoid derived from human iPSC.

349

350

351

352

353

354

355

356

357

358

359

360

361

362



363 Supplemental Information

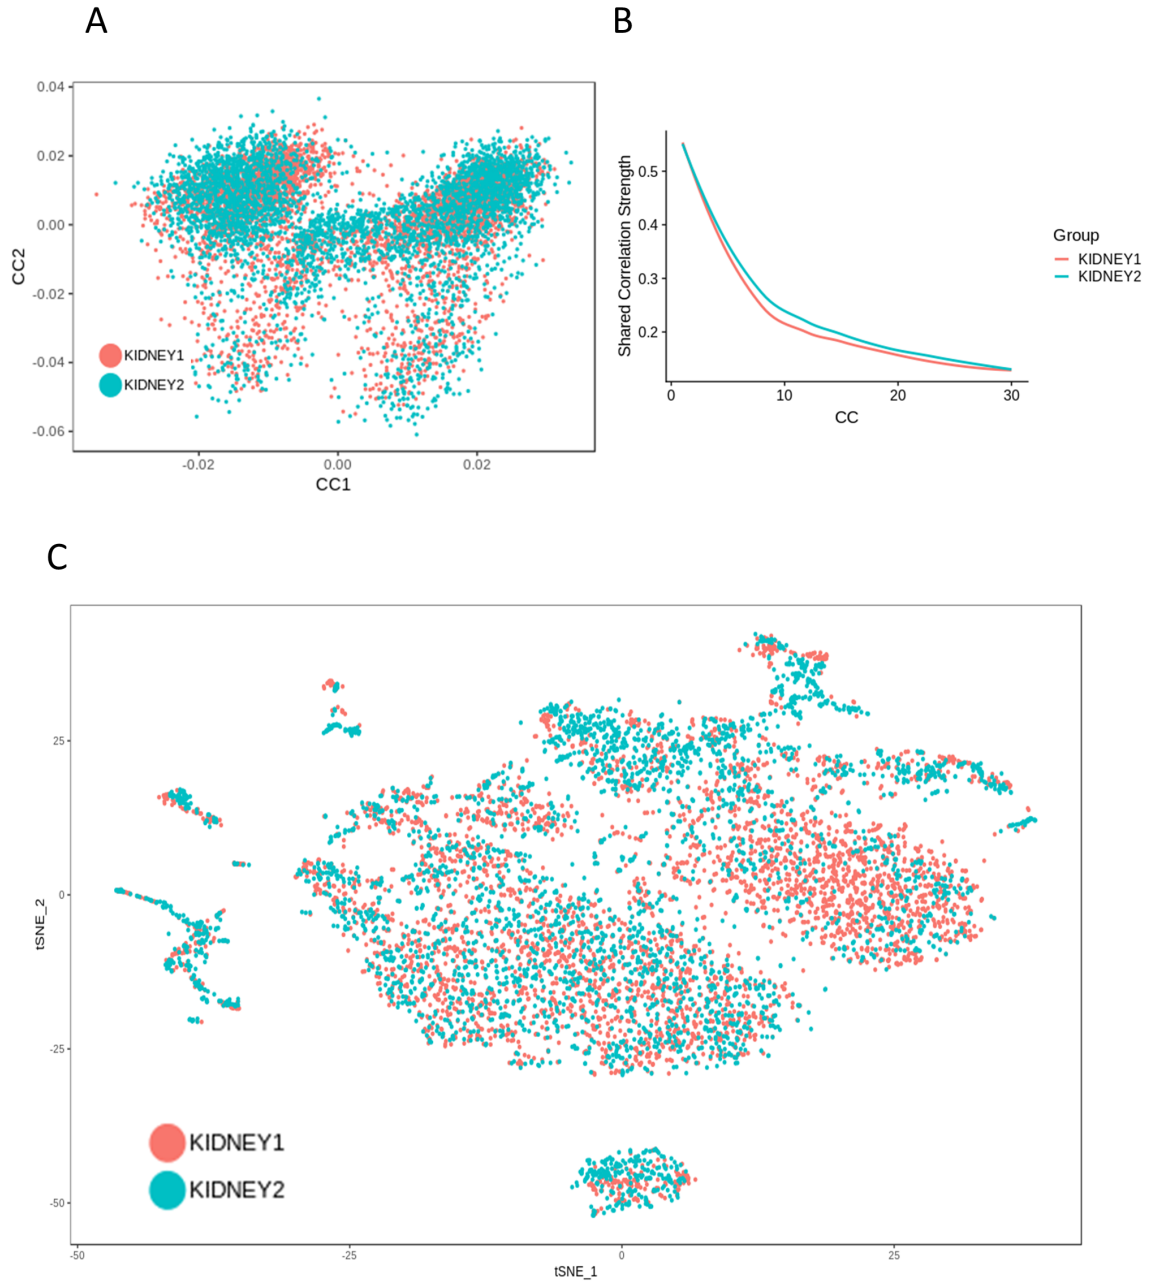

Sup fig 1

365 **Fig. S1. Canonical correlation with batch correction between the two foetal kidneys process in**  
366 **single cell transcriptome.**

367 **(a)** Factorial map showing superposition of the cells from the respective kidney during the canonical  
368 correlation.

369 **(b)** Profile of the shared correlation strength between the respective kidneys (30 dimensions); tSNE plot  
370 post canonical correlation on the merged 2 kidneys.

371 **(c)** t-SNE dimension reduction of single cell transcriptome from human fetal kidney after batch  
372 correction, cells from each kidney (respectively green and red) are plotted with t-SNE dimension  
373 reduction algorithm and their distribution in the map confirmed a good batch correction during the  
374 analyses (canonical correlation with Seurat R-package).

375

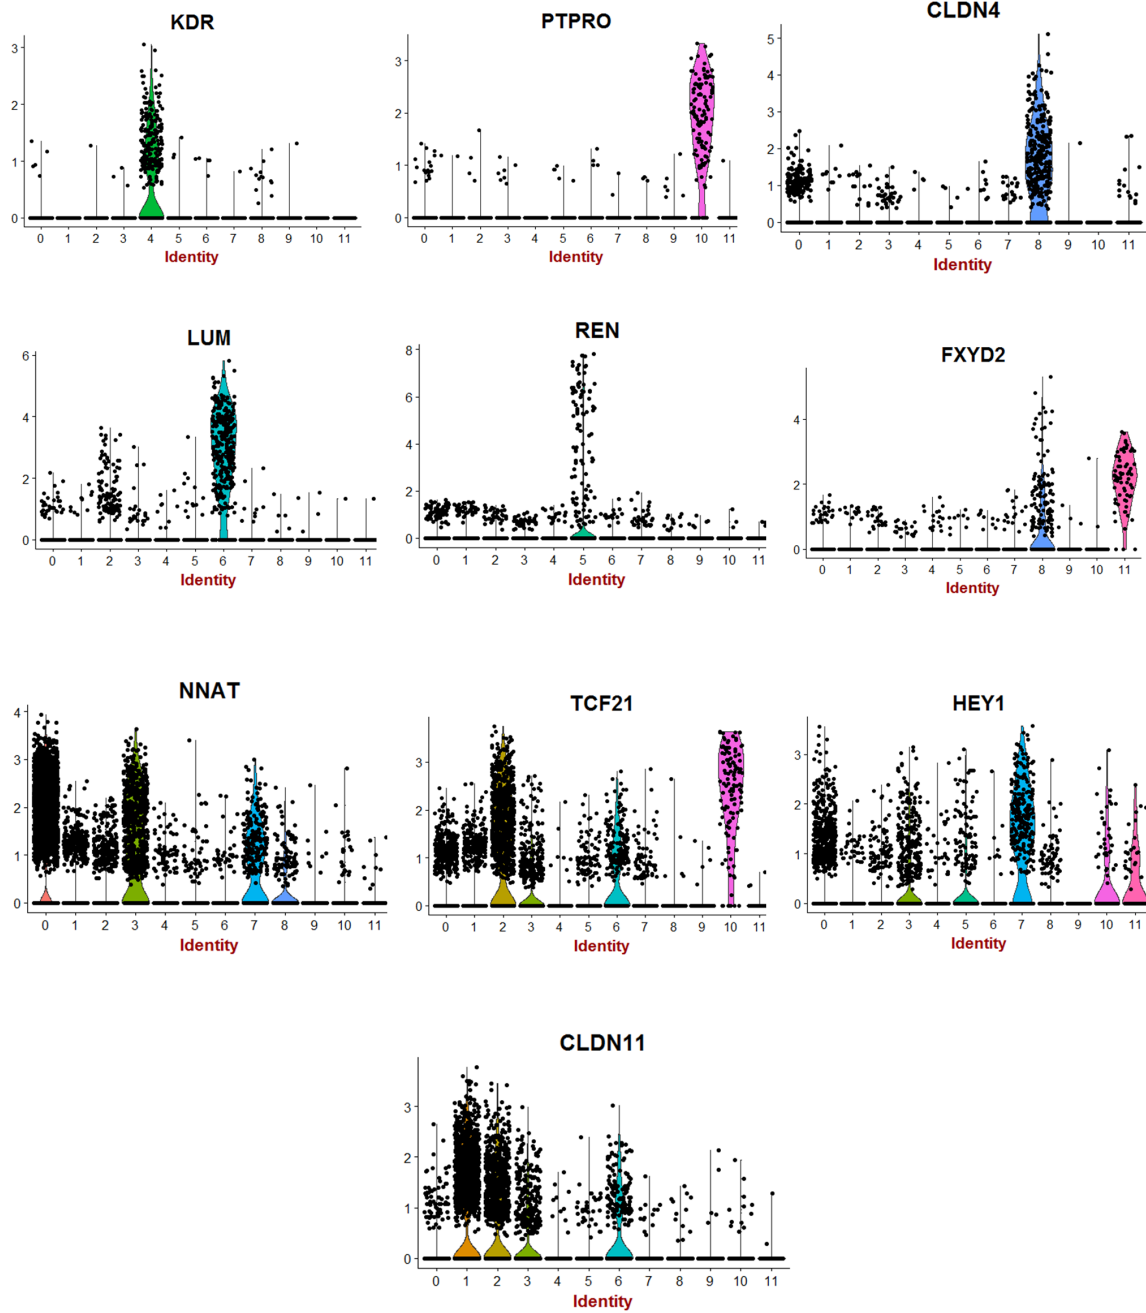

Sup fig 2

377 **Fig. S2. Violinplot of cluster markers found in single cell sequencing after merging the fetal cortex**  
378 **of two human kidneys.**

379

380

| gene symbol | description                                               | p_val             | p_val_adj         | avg_logFC cluster 9 / other clusters | percent of cells positives in cluster 9 | percent of cells positives in others clusters |
|-------------|-----------------------------------------------------------|-------------------|-------------------|--------------------------------------|-----------------------------------------|-----------------------------------------------|
| SRGN        | serglycin                                                 | 0.00000<br>0e+00  | 0.00000<br>0e+00  | 3.5101006                            | 0.908                                   | 0.011                                         |
| TYROBP      | TYRO protein tyrosine kinase binding protein              | 0.00000<br>0e+00  | 0.00000<br>0e+00  | 2.6363035                            | 0.842                                   | 0.003                                         |
| AIF1        | allograft inflammatory factor 1                           | 0.00000<br>0e+00  | 0.00000<br>0e+00  | 2.5726665                            | 0.875                                   | 0.039                                         |
| FCER1G      | Fc fragment of IgE receptor Ig                            | 0.00000<br>0e+00  | 0.00000<br>0e+00  | 2.0257601                            | 0.825                                   | 0.007                                         |
| CORO1A      | coronin 1A                                                | 0.00000<br>0e+00  | 0.00000<br>0e+00  | 1.952294                             | 0.825                                   | 0.028                                         |
| LAPTM5      | lysosomal protein transmembrane 5                         | 0.00000<br>0e+00  | 0.00000<br>0e+00  | 1.8567379                            | 0.883                                   | 0.012                                         |
| HLA-DRA     | major histocompatibility complex, class II, DR alpha      | 8.59067<br>3e-278 | 1.55654<br>4e-273 | 3.3328299                            | 0.758                                   | 0.044                                         |
| ARHGDI1B    | Rho GDP dissociation inhibitor beta                       | 1.05485<br>4e-240 | 1.91129<br>0e-236 | 1.7169804                            | 0.825                                   | 0.063                                         |
| CXCR4       | C-X-C motif chemokine receptor 4                          | 5.16156<br>8e-214 | 9.35224<br>5e-210 | 2.3270686                            | 0.808                                   | 0.068                                         |
| HLA-B       | major histocompatibility complex, class I, B              | 3.57343<br>7e-157 | 6.47471<br>1e-153 | 1.7383077                            | 0.858                                   | 0.109                                         |
| CD74        | CD74 molecule                                             | 3.49344<br>9e-115 | 6.32978<br>0e-111 | 3.0782853                            | 0.892                                   | 0.193                                         |
| HLA-C       | major histocompatibility complex, class I, C              | 3.00488<br>0e-94  | 5.44454<br>3e-90  | 1.6342965                            | 0.908                                   | 0.219                                         |
| ARPC1B      | actin related protein 2/3 complex subunit 1B              | 2.54694<br>4e-90  | 4.61480<br>9e-86  | 1.4584647                            | 0.800                                   | 0.183                                         |
| CYBA        | cytochrome b-245 alpha chain                              | 5.40233<br>4e-76  | 9.78848<br>9e-72  | 1.268269                             | 0.758                                   | 0.184                                         |
| EZR         | ezrin                                                     | 3.36348<br>2e-69  | 6.09429<br>3e-65  | 1.3665193                            | 0.800                                   | 0.226                                         |
| B2M         | beta-2-microglobulin                                      | 3.75702<br>2e-62  | 6.80734<br>8e-58  | 1.6959188                            | 0.992                                   | 0.874                                         |
| FTL         | ferritin light chain                                      | 2.62243<br>9e-52  | 4.75159<br>7e-48  | 2.2176857                            | 0.983                                   | 0.991                                         |
| PFN1        | profilin 1                                                | 3.77142<br>4e-51  | 6.83344<br>4e-47  | 1.1018237                            | 0.975                                   | 0.837                                         |
| GPX1        | glutathione peroxidase 1                                  | 2.41810<br>7e-47  | 4.38136<br>9e-43  | 1.647589                             | 0.883                                   | 0.556                                         |
| OAZ1        | ornithine decarboxylase antizyme 1                        | 2.88077<br>6e-45  | 5.21967<br>7e-41  | 0.9077703                            | 0.983                                   | 0.903                                         |
| ARPC3       | actin related protein 2/3 complex subunit 3               | 2.47218<br>9e-44  | 4.47935<br>9e-40  | 1.0166798                            | 0.917                                   | 0.663                                         |
| SH3BGR1L3   | SH3 domain binding glutamate rich protein like 3          | 2.34788<br>3e-43  | 4.25412<br>9e-39  | 1.2094052                            | 0.908                                   | 0.559                                         |
| SAT1        | spermidine/spermine N1-acetyltransferase 1                | 4.57738<br>6e-41  | 8.29376<br>5e-37  | 2.4506195                            | 0.883                                   | 0.584                                         |
| TMSB4X      | thymosin beta 4 X-linked                                  | 2.35164<br>6e-39  | 4.26094<br>8e-35  | 0.9379118                            | 1.000                                   | 0.997                                         |
| TPM3        | tropomyosin 3                                             | 4.03955<br>9e-39  | 7.31927<br>7e-35  | 0.9303993                            | 0.867                                   | 0.486                                         |
| SQSTM1      | sequestosome 1                                            | 1.19626<br>1e-37  | 2.16750<br>5e-33  | 1.2387851                            | 0.833                                   | 0.377                                         |
| ARPC2       | actin related protein 2/3 complex subunit 2               | 1.54151<br>1e-36  | 2.79306<br>4e-32  | 0.9370998                            | 0.908                                   | 0.695                                         |
| NEAT1       | nuclear paraspeckle assembly transcript 1                 | 1.67148<br>0e-36  | 3.02855<br>4e-32  | 1.6546878                            | 0.917                                   | 0.674                                         |
| CST3        | cystatin C                                                | 1.99687<br>7e-33  | 3.61814<br>2e-29  | 2.1934329                            | 0.792                                   | 0.581                                         |
| REL         | REL proto-oncogene, NF-kB subunit                         | 7.49099<br>5e-33  | 1.35729<br>3e-28  | 1.104068                             | 0.758                                   | 0.357                                         |
| TPT1        | tumor protein, translationally-controlled 1               | 1.07574<br>0e-32  | 1.94913<br>4e-28  | 0.5573017                            | 1.000                                   | 0.999                                         |
| HSPD1       | heat shock protein family D                               | 6.13724<br>3e-31  | 1.11200<br>7e-26  | 0.7874673                            | 0.975                                   | 0.933                                         |
| FTH1        | ferritin heavy chain 1                                    | 1.73854<br>8e-29  | 3.15007<br>6e-25  | 1.4701043                            | 1.000                                   | 0.999                                         |
| UBA52       | ubiquitin A-52 residue ribosomal protein fusion product 1 | 2.63523<br>9e-28  | 4.77478<br>9e-24  | 0.4379137                            | 0.983                                   | 0.994                                         |

|           |                                                      |                  |                  |           |       |       |
|-----------|------------------------------------------------------|------------------|------------------|-----------|-------|-------|
| MCL1      | MCL1, BCL2 family apoptosis regulator                | 9.75888<br>7e-28 | 1.76821<br>3e-23 | 0.9316168 | 0.758 | 0.393 |
| HSPH1     | heat shock protein family H                          | 4.92136<br>8e-26 | 8.91702<br>7e-22 | 0.8444851 | 0.942 | 0.796 |
| RPLP1     | ribosomal protein lateral stalk subunit P1           | 7.35494<br>2e-26 | 1.33264<br>2e-21 | 0.3610463 | 1.000 | 1.000 |
| COTL1     | coactosin like F-actin binding protein 1             | 3.24024<br>6e-25 | 5.87100<br>1e-21 | 1.0506476 | 0.817 | 0.520 |
| CALM1     | calmodulin 1                                         | 1.19590<br>2e-23 | 2.16685<br>5e-19 | 0.7064824 | 0.900 | 0.609 |
| CLIC1     | chloride intracellular channel 1                     | 2.35357<br>1e-23 | 4.26443<br>6e-19 | 0.7654192 | 0.850 | 0.560 |
| HSPE1     | heat shock protein family E                          | 8.89503<br>9e-23 | 1.61169<br>2e-18 | 0.6329032 | 0.975 | 0.936 |
| EEF1B2    | eukaryotic translation elongation factor 1 beta 2    | 3.57260<br>7e-22 | 6.47320<br>6e-18 | 0.580957  | 0.933 | 0.876 |
| UBC       | ubiquitin C                                          | 1.03192<br>8e-21 | 1.86975<br>1e-17 | 0.8486491 | 0.992 | 0.950 |
| ATP5E     |                                                      | 3.13017<br>8e-21 | 5.67156<br>9e-17 | 0.4818868 | 0.967 | 0.966 |
| FAU       | FAU, ubiquitin like and ribosomal protein S30 fusion | 2.20199<br>2e-20 | 3.98979<br>0e-16 | 0.3237957 | 0.992 | 0.998 |
| NPC2      | NPC intracellular cholesterol transporter 2          | 2.95118<br>1e-20 | 5.34724<br>6e-16 | 1.1277988 | 0.783 | 0.594 |
| RPLP2     | ribosomal protein lateral stalk subunit P2           | 4.54839<br>7e-18 | 8.24124<br>1e-14 | 0.2593048 | 0.992 | 1.000 |
| SERP1     | stress associated endoplasmic reticulum protein 1    | 1.03484<br>0e-17 | 1.87502<br>7e-13 | 0.4892011 | 0.867 | 0.669 |
| PABPC1    | poly                                                 | 1.15185<br>5e-15 | 2.08704<br>5e-11 | 0.4134638 | 0.967 | 0.948 |
| SLC25A5   | solute carrier family 25 member 5                    | 1.77520<br>5e-14 | 3.21649<br>3e-10 | 0.5403144 | 0.808 | 0.737 |
| EIF1      | eukaryotic translation initiation factor 1           | 2.33957<br>3e-14 | 4.23907<br>2e-10 | 0.3121184 | 1.000 | 0.998 |
| SELK      |                                                      | 2.54124<br>0e-14 | 4.60447<br>3e-10 | 0.7817369 | 0.842 | 0.716 |
| S100A11   | S100 calcium binding protein A11                     | 6.34918<br>7e-14 | 1.15040<br>9e-09 | 0.8247093 | 0.758 | 0.633 |
| SERF2     | small EDRK-rich factor 2                             | 9.11704<br>4e-14 | 1.65191<br>7e-09 | 0.2917475 | 0.992 | 0.986 |
| NOP10     | NOP10 ribonucleoprotein                              | 1.15830<br>4e-13 | 2.09873<br>1e-09 | 0.5102016 | 0.758 | 0.487 |
| RPS28     | ribosomal protein S28                                | 3.75832<br>5e-13 | 6.80970<br>9e-09 | 0.2564121 | 1.000 | 1.000 |
| CAPZB     | capping actin protein of muscle Z-line subunit beta  | 4.34631<br>3e-13 | 7.87508<br>4e-09 | 0.5952878 | 0.758 | 0.592 |
| RPS29     | ribosomal protein S29                                | 8.45317<br>6e-13 | 1.53163<br>1e-08 | 0.2746119 | 1.000 | 1.000 |
| DNAJB1    | DnaJ heat shock protein family                       | 1.98858<br>2e-12 | 3.60311<br>3e-08 | 0.5654268 | 0.933 | 0.841 |
| SDCBP     | syndecan binding protein                             | 2.47872<br>7e-12 | 4.49120<br>5e-08 | 0.6616057 | 0.758 | 0.557 |
| BTG1      | BTG anti-proliferation factor 1                      | 2.74069<br>2e-12 | 4.96586<br>0e-08 | 0.8923802 | 0.775 | 0.601 |
| PSAP      | prosaposin                                           | 9.04875<br>2e-12 | 1.63954<br>3e-07 | 0.6605145 | 0.833 | 0.767 |
| DUSP1     | dual specificity phosphatase 1                       | 3.68232<br>5e-11 | 6.67200<br>4e-07 | 0.4921929 | 0.817 | 0.564 |
| COX4I1    | cytochrome c oxidase subunit 4I1                     | 5.71414<br>4e-11 | 1.03534<br>6e-06 | 0.2968962 | 0.933 | 0.936 |
| UBE2D3    | ubiquitin conjugating enzyme E2 D3                   | 1.19968<br>1e-10 | 2.17370<br>2e-06 | 0.3807076 | 0.883 | 0.792 |
| HSP90A A1 | heat shock protein 90 alpha family class A member 1  | 3.30009<br>0e-10 | 5.97943<br>4e-06 | 0.4127855 | 1.000 | 0.999 |
| PCBP1     | poly                                                 | 5.38698<br>2e-10 | 9.76067<br>2e-06 | 0.4278739 | 0.842 | 0.716 |
| YBX1      | Y-box binding protein 1                              | 7.68621<br>0e-10 | 1.39266<br>4e-05 | 0.3772188 | 0.833 | 0.837 |
| CFL1      | cofilin 1                                            | 7.88459<br>0e-10 | 1.42860<br>9e-05 | 0.2672531 | 0.983 | 0.974 |
| ACTB      | actin beta                                           | 1.05218<br>7e-09 | 1.90645<br>8e-05 | 0.3932285 | 1.000 | 0.999 |

|        |                                                 |                  |                  |           |       |       |
|--------|-------------------------------------------------|------------------|------------------|-----------|-------|-------|
| PGK1   | phosphoglycerate kinase 1                       | 3.33086<br>6e-09 | 6.03519<br>6e-05 | 0.4577908 | 0.758 | 0.643 |
| SUB1   | SUB1 homolog,<br>transcriptional regulator      | 3.34726<br>4e-09 | 6.06490<br>9e-05 | 0.3576456 | 0.908 | 0.857 |
| H3F3B  | H3 histone family member 3B                     | 3.75381<br>7e-09 | 6.80154<br>1e-05 | 0.3144709 | 0.992 | 0.993 |
| DNAJB6 | DnaJ heat shock protein<br>family               | 2.32612<br>9e-07 | 4.21471<br>3e-03 | 0.4016447 | 0.925 | 0.868 |
| CSTB   | cystatin B                                      | 3.19623<br>7e-07 | 5.79126<br>1e-03 | 0.4852028 | 0.767 | 0.624 |
| RHOA   | ras homolog family member A                     | 1.30452<br>7e-06 | 2.36367<br>2e-02 | 0.2910496 | 0.858 | 0.814 |
| HSPA1A | heat shock protein family A                     | 2.97978<br>5e-06 | 5.39907<br>2e-02 | 0.331032  | 0.942 | 0.994 |
| HSPB1  | heat shock protein family B                     | 3.51673<br>7e-06 | 6.37197<br>5e-02 | 0.4753915 | 0.925 | 0.941 |
| GPBP1  | GC-rich promoter binding<br>protein 1           | 5.38740<br>6e-06 | 9.76144<br>1e-02 | 0.4378892 | 0.800 | 0.769 |
| EIF4A1 | eukaryotic translation<br>initiation factor 4A1 | 2.65684<br>0e-05 | 4.81392<br>8e-01 | 0.2558842 | 0.958 | 0.966 |
| SRSF7  | serine and arginine rich<br>splicing factor 7   | 1.01351<br>1e-03 | 1.00000<br>0e+00 | 0.3631672 | 0.800 | 0.726 |
| GPX4   | glutathione peroxidase 4                        | 1.38276<br>5e-03 | 1.00000<br>0e+00 | 0.2528755 | 0.817 | 0.758 |
| ENO1   | enolase 1                                       | 2.66107<br>9e-02 | 1.00000<br>0e+00 | 0.2645355 | 0.742 | 0.769 |

381

382 **Table S1-Table presenting differential expressed genes found in cluster 9 as compared to others**

383 **clusters in human fetal kidney cortex.**

384
